# Supplementary material
Source: Research Square preprint supplement (doi:10.21203/rs.3.rs-8076104/v1)
Supplement: Supplementary file 1 [file 286c63d2e0708b426903682c.docx]

**Supplementary information**

**Additional file 1: Model selection results**

**Model selection**

Backward stepwise selection was performed with drop1(..., test = "Chisq"). “AIC_after” is the AIC of the updated model; “ΔAIC” is the change from the previous step. *LRT* and *p* are the likelihood-ratio test statistic and p-value comparing the reduced model to the previous model. The final model is the last step, where removing any remaining term increased AIC.

**Table S1** Backward stepwise model selection for tick presence across all transects (binomial GLMM).

| **Step** | **Model** | **Removed term** | **AIC_after** | **ΔAIC** | **LRT** | **p_value** |
| --- | --- | --- | --- | --- | --- | --- |
| 0 | model_1 (full) | (none) | 1667.624 |  |  |  |
| 1 | model_1a | dom.veg | 1663.443 | -4.181 | 3.82 | 0.43 |
| 2 | model_1b | SD | 1661.766 | -1.677 | 0.32 | 0.57 |
| 3 | model_1c | veg_density | 1661.206 | -0.560 | 1.44 | 0.23 |
| 4 | model_1d (final) | cow_piles | 1660.800 | -0.406 | 1.59 | 0.21 |

**Table S2** Backward stepwise model selection for nymph density at pasture boundaries (0 m) (negative binomial GLMM).

| **Step** | **Model** | **Removed term** | **AIC_after** | **ΔAIC** | **LRT** | **p_value** |
| --- | --- | --- | --- | --- | --- | --- |
| 0 | neg_bin_model1 (full) | (none) | 1436.23 |  |  |  |
| 1 | model_1a | dom.veg | 1431.004 | -5.226 | 2.77 | 0.60 |
| 2 | model_1b | SD | 1429.479 | -1.525 | 0.48 | 0.49 |
| 3 | model_1c | Visible.fence | 1428.624 | -0.855 | 1.15 | 0.28 |
| 4 | model_1d (final) | Ditch | 1428.515 | -0.109 | 1.89 | 0.17 |

**Additional file 2: Cattle pathogen prevalence and correlation analysis**

**Table S3** Cattle pathogen prevalence with 95% confidence intervals (CI) and mean tick abundance with standard deviation (SD) (calculated as the average number of ticks per transect at 0 m from pasture boundaries within sampled grazing pastures on each farm).

| **Farm** | **Mean tick abundance (SD)** | ***A. phagocytophilum*** | ***B. divergens*** |
| --- | --- | --- | --- |
| **% prevalence**  **(95% CI)** | **% prevalence**  **(95% CI)** |
| 1 | 2.17 (4.96) | 24 (11.5-43.4) | 4 (0.7-19.5) |
| 2 | 3.83 (4.09) | 10 (4.9-19.2) | 0 (0.0-5.2) |
| 3 | 2.56 (5.52) | 4 (1.1-13.5) | 2 (0.4-10.5) |
| 4 | 3.14 (4.67) | 8.3 (3.9-17.0) | 0 (0.0-5.1) |
| 5 | 1.61 (1.90) | 7.9 (3.7-16.2) | 0 (0.0-4.8) |
| 6 | 5.00 (4.55) | 15.8 (9.3-25.6) | 0 (0.0-4.8) |
| 7 | 2.56 (4.43) | 4.7 (1.6-12.9) | 0 (0.0-5.7) |
| 8 | 1.11 (2.43) | 0 (0.0-6.0) | 0 (0.0-6.0) |
| 9 | 0.81 (1.17) | 0 (0.0-6.0) | 0 (0.0-6.0) |
| 10 | 1.56 (2.82) | 38.7 (27.6-51.2) | 0 (0.0-5.8) |
| 11 | 1.58 (2.96) | 8.5 (3.7-18.4) | 0 (0.0-6.1) |
| 12 | 4.11 (7.21) | 7.1 (3.1-15.7) | 0 (0.0-5.2) |

**Table S4** Pearson correlation coefficients (r) with 95% confidence intervals (CI) and p-values for crude farm-level associations between herd prevalence of *A. phagocytophilum* and *B. divergens* (adult cattle only), mean tick abundance at 0 m transects, and woodland cover within 50 m buffers.

| **Variable 1** | **Variable 2** | **Correlation coefficient (r)** | **95% CI** | **p-value** |
| --- | --- | --- | --- | --- |
| AP prevalence | BD prevalence | 0.263 | -0.366 - 0.727 | 0.409 |
| AP prevalence | Mean tick abundance (0m) | 0.067 | -0.527 - 0.617 | 0.836 |
| AP prevalence | Wood cover within 50m (pasture) | -0.08 | -0.625 - 0.518 | 0.805 |
| AP prevalence | Wood cover within 50m (boundary) | -0.087 | -0.629 - 0.512 | 0.788 |
| BD prevalence | Mean tick abundance (0m) | -0.07 | -0.619 - 0.525 | 0.829 |
| BD prevalence | Wood cover within 50m (pasture) | -0.358 | -0.773 - 0.272 | 0.253 |
| BD prevalence | Wood cover within 50m (pasture) | -0.362 | -0.775 - 0.268 | 0.248 |
| Mean tick abundance (0m) | Wood cover within 50m (pasture) | 0.41 | -0.214 - 0.797 | 0.185 |
| Mean tick abundance (0m) | Wood cover within 50m (boundary) | 0.075 | -0.521 - 0.622 | 0.817 |
| Wood cover within 50m (pasture) | Wood cover within 50m (boundary) | 0.924 | 0.747 - 0.979 | < 0.0001 |
